# Supplementary material for: Triple-Negative Breast Cancer Intrinsic FTSJ1 Favors Tumor Progression and Attenuates CD8+ T Cell Infiltration
Source: MDPI journal article supplement (doi:10.3390/cancers16030597), 2024-01-31
Supplement: s1 [file s1]

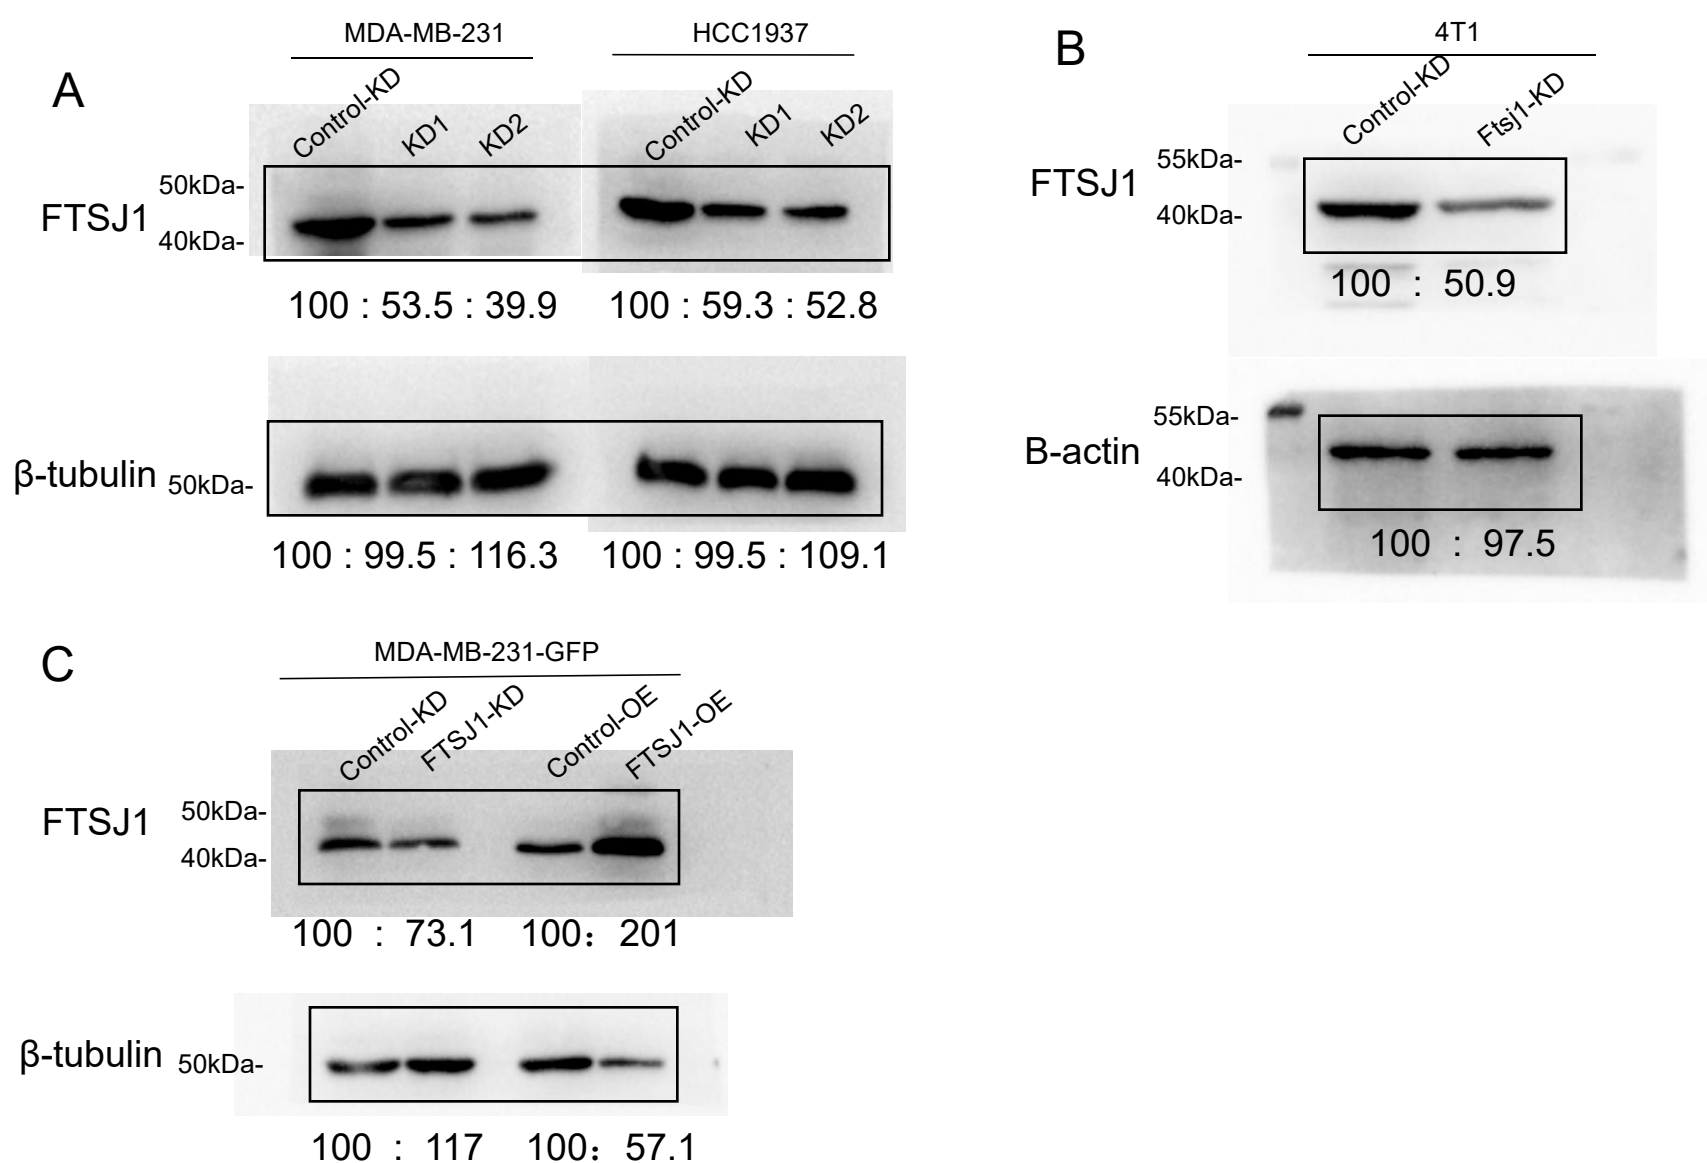

Figure S1. Knockdown efficiency in FTSJ1-KD and control (A) MDA-MB-231 and HCC1937 cells, (B) 4T1 cells, include densitometry readings/intensity ratio. (C) Knockdown and overexpression efficiency in FTSJ1-KD, OE and control MDA-MB-231-GFP cells, include densitometry readings/intensity ratio.
